# Supplementary material for: Point-of-Care and Rapid Tests for the Etiological Diagnosis of Respiratory Tract Infections in Children: A Systematic Review and Meta-Analysis
Source: MDPI journal article supplement (doi:10.3390/antibiotics11091192), 2022-09-03
Supplement: s1 [file s1]

## **Supplementary Material File S1. Search strategy:**

1. (newborn\* or neonat\* or infan\* or toddler\* or pre-schooler\* or preschooler\* or child\* OR children or adolescen\* or pediatri\* or paediatric\* or youth\* or teen or teens or teenage\* or kid or kids or baby or babies).mp. [mp=title, abstract, original title, name of substance word, subject heading word, floating sub-heading word, keyword heading word, protocol supplementary concept word, rare disease supplementary concept word, unique identifier, synonyms]
2. Point-of-care ADJ4 Test\*.mp. [mp=title, abstract, original title, name of substance word, subject heading word, floating sub-heading word, keyword heading word, protocol supplementary concept word, rare disease supplementary concept word, unique identifier, synonyms]
3. Rapid ADJ4 test\*.mp. [mp=title, abstract, original title, name of substance word, subject heading word, floating sub-heading word, keyword heading word, protocol supplementary concept word, rare disease supplementary concept word, unique identifier, synonyms]
4. Near patient test\*.mp. [mp=title, abstract, original title, name of substance word, subject heading word, floating sub-heading word, keyword heading word, protocol supplementary concept word, rare disease supplementary concept word, unique identifier, synonyms]
5. Film array.mp [mp=title, abstract, original title, name of substance word, subject heading word, floating sub-heading word, keyword heading word, protocol supplementary concept word, rare disease supplementary concept word, unique identifier, synonyms]
6. Multiplex ADJ2 PCR.mp [mp=title, abstract, original title, name of substance word, subject heading word, floating sub-heading word, keyword heading word, protocol supplementary concept word, rare disease supplementary concept word, unique identifier, synonyms]
7. Multiplex ADJ2 Polymerase Chain Reaction.mp [mp=title, abstract, original title, name of substance word, subject heading word, floating sub-heading word, keyword heading word,

- protocol supplementary concept word, rare disease supplementary concept word, unique identifier, synonyms]
8. 2 or 3 or 4 or 5 or 6 or 7
  9. exp "Outcome Assessment (Health Care)"/ or outcome\*.mp. [mp=title, abstract, original title, name of substance word, subject heading word, floating sub-heading word, keyword heading word, protocol supplementary concept word, rare disease supplementary concept word, unique identifier, synonyms]
  10. exp "Costs and Cost Analysis"/ or cost\*.ti,ab,kw.
  11. exp "Patient Care"/ or patient care\*.mp [mp=title, abstract, original title, name of substance word, subject heading word, floating sub-heading word, keyword heading word, protocol supplementary concept word, rare disease supplementary concept word, unique identifier, synonyms]
  12. Mortality/ or mortality.fs. or (mortalit\* or death\* or fatal\*).ti,ab,kw. or Morbidity/ or morbidit\*.ti,ab,kw.
  13. (anti-bacterial\* or antibacterial\* or anti-viral\* or antiviral\* or antibiotic\* or anti-infective or bactericid\* or bacteriocid\* or antimicrobial).mp. [mp=title, abstract, original title, name of substance word, subject heading word, floating sub-heading word, keyword heading word, protocol supplementary concept word, rare disease supplementary concept word, unique identifier, synonyms]
  14. 9 or 10 or 11 or 12 or 13
  15. 1 and 8 and 14
  16. 15 not case reports.pt.
  17. 16 not (exp HIV Infections/ or exp HIV/ or (HIV or human immunodeficiency virus).mp. or exp Plasmodium/ or plasmodium.mp. or exp Malaria/ or malaria.mp. or exp

Mycobacterium infections/ or mycobacterium infection\*.mp or exp Mycobacterium/ or mycobacterium.mp) [mp=title, abstract, original title, name of substance word, subject heading word, floating sub-heading word, keyword heading word, protocol supplementary concept word, rare

18. Limit 17 to yr= "2000 - 2021"
