# Supplementary material for: Point-of-Care and Rapid Tests for the Etiological Diagnosis of Respiratory Tract Infections in Children: A Systematic Review and Meta-Analysis
Source: MDPI journal article supplement (doi:10.3390/antibiotics11091192), 2022-09-03
Supplement: s1 [file s1]

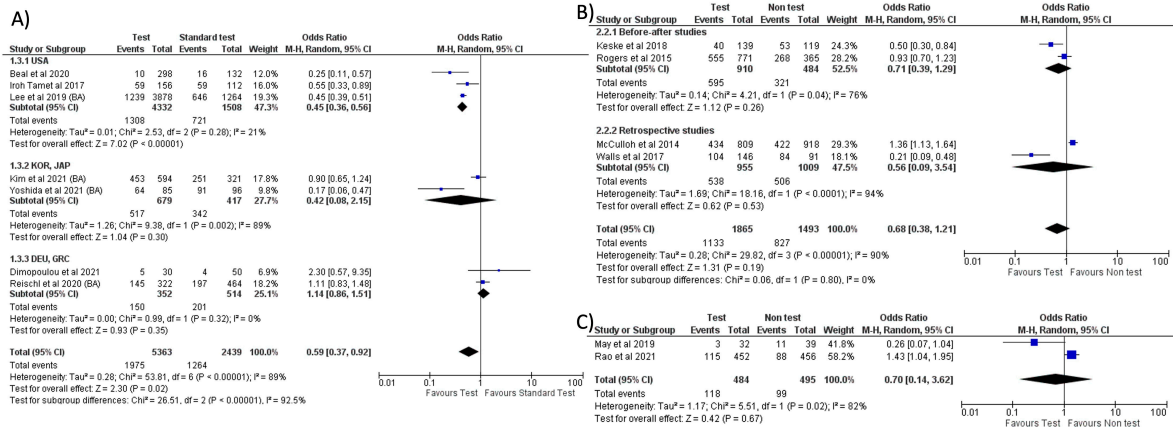

**Figure S1.** Forest Plot of prescription of antibiotics after implementation of FA-RP: A) FA-RP versus Standard test stratified for different countries; B) FA-RP versus clinical diagnosis in observational studies; C) FA-RP versus clinical diagnosis in randomized controlled trial

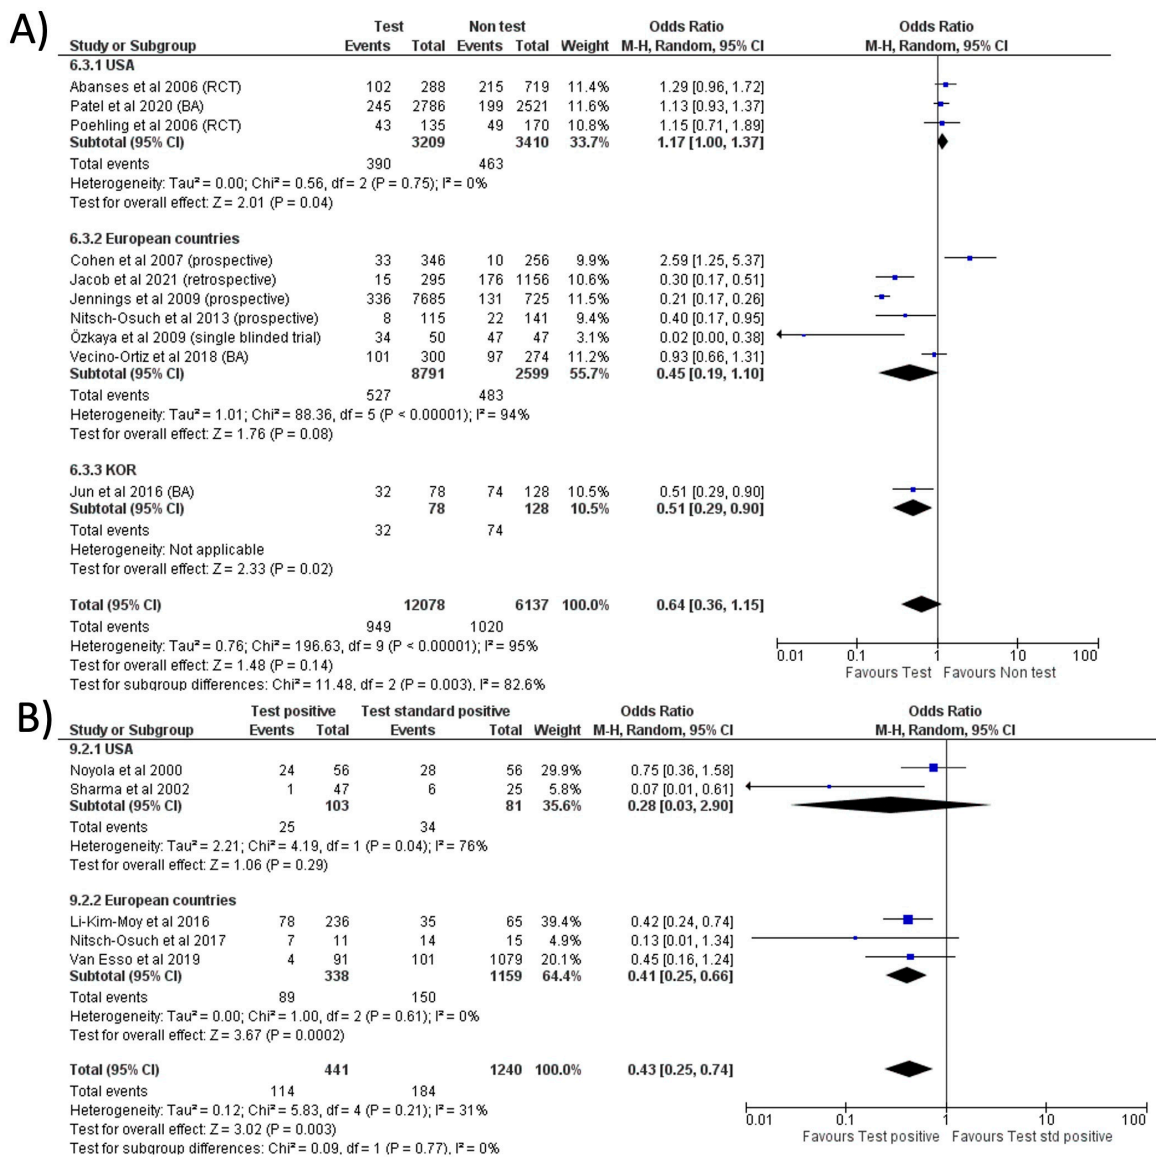

**Figure S2.** Forest Plot of prescription of antibiotics after implementation of RIDT: A) RIDT vs clinical diagnosis stratified by countries; B) RIDT positive vs standard test positive stratified by countries

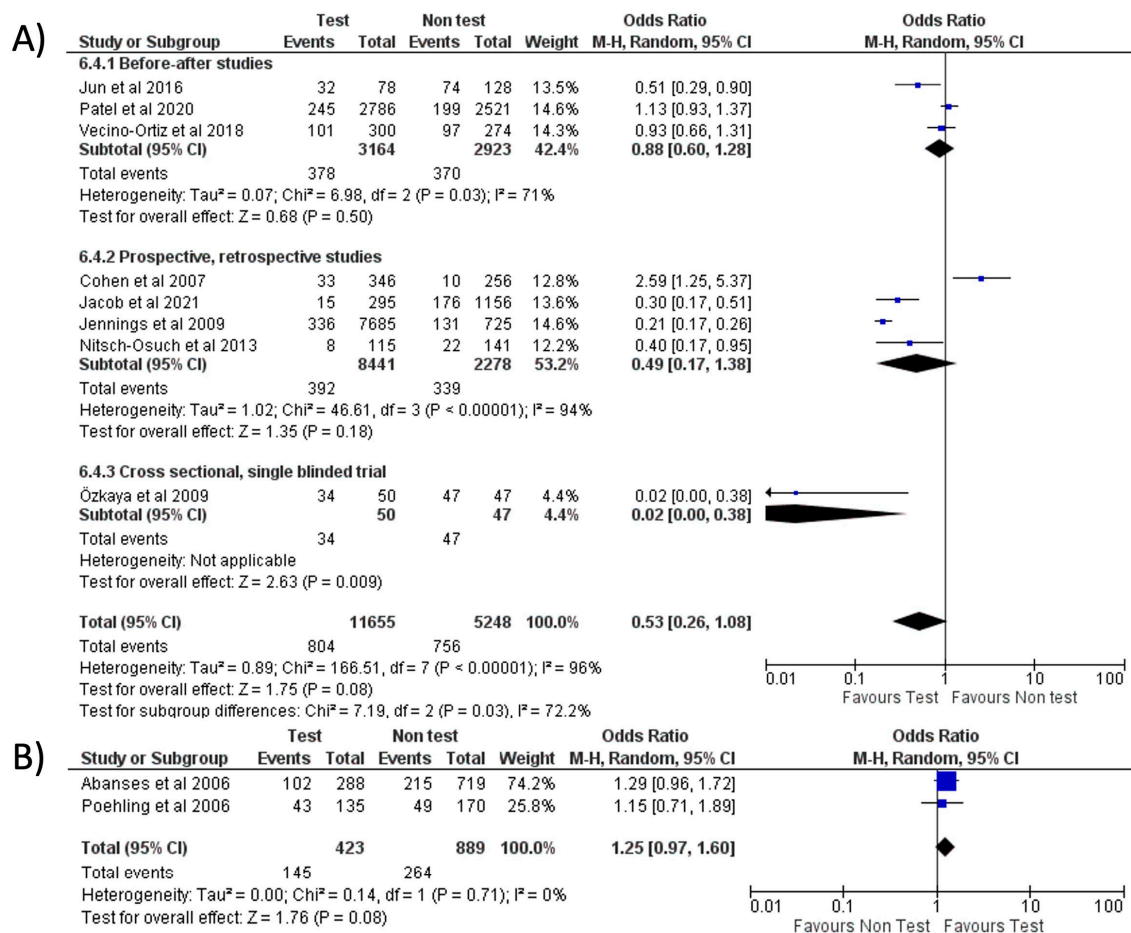

**Figure S3.** Forest Plot of prescription of antibiotics after implementation of RIDT: A) RIDT vs clinical diagnosis in observational studies; B) RIDT vs clinical diagnosis in RCT

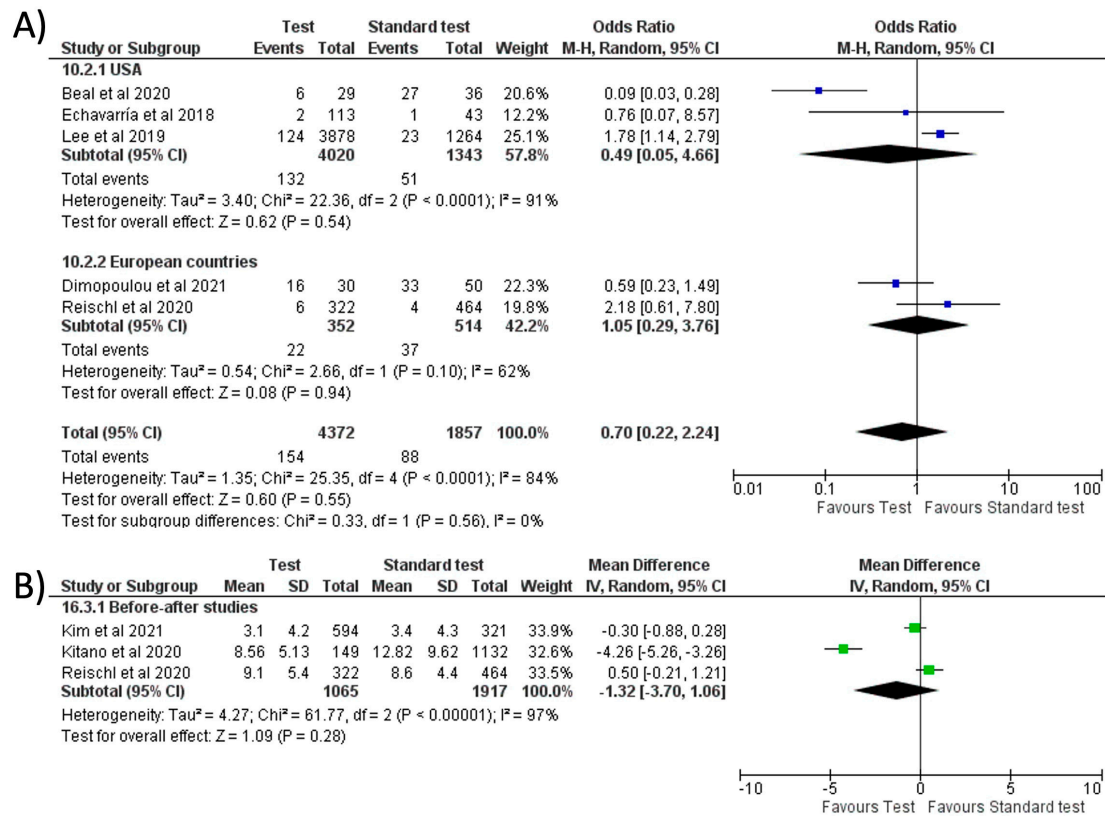

**Figure S4.** Forest Plot A) of prescription of oseltamivir after implementation of FA-RP versus Standard test stratified for different countries; B) of days of therapy after implementation of FA-RP versus Standard Test
