# Supplementary material for: Point-of-Care and Rapid Tests for the Etiological Diagnosis of Respiratory Tract Infections in Children: A Systematic Review and Meta-Analysis
Source: MDPI journal article supplement (doi:10.3390/antibiotics11091192), 2022-09-03
Supplement: s1 [file s1]

**Table S1. NIH Assessment Tools for Observational Studies.**

|                                | Q1 | Q2 | Q3 | Q4 | Q5 | Q6 | Q7 | Q8 | Q9 | Q10 | Q11 | Q12 | Q13 | Q14 | Overall | QUALITY |
|--------------------------------|----|----|----|----|----|----|----|----|----|-----|-----|-----|-----|-----|---------|---------|
| Beal et al, 2020               | 1  | 1  | 0  | 1  | 0  | 1  | 1  | 0  | 1  | 0   | 1   | 0   | 0   | 0   | 7       | FAIR    |
| Benito - Fernandez et al, 2006 | 1  | 1  | NA | 1  | 0  | 1  | 1  | 0  | 1  | 0   | 1   | 0   | 1   | 0   | 8       | FAIR    |
| Busson et al, 2019             | 1  | 1  | 1  | 1  | 0  | 1  | 1  | NA | 1  | 0   | 1   | 0   | NA  | 1   | 9       | FAIR    |
| Byington et al, 2002           | 1  | 1  | 1  | 0  | 0  | 1  | 1  | NA | 1  | 0   | 1   | 0   | NA  | 0   | 7       | FAIR    |
| Cantais et al, 2019            | 1  | 1  | 1  | 1  | 0  | 1  | 1  | NA | 1  | NA  | 1   | 0   | 0   | 0   | 8       | FAIR    |
| Cohen et al, 2007              | 1  | 1  | NA | 0  | 0  | 1  | 1  | NA | 1  | 0   | 1   | 0   | 0   | 0   | 6       | FAIR    |
| de La Rocque et al, 2009       | 1  | 1  | 1  | 1  | 1  | 1  | 1  | NA | 1  | 1   | 1   | 0   | 1   | 0   | 11      | GOOD    |
| Diallo et al, 2019             | 1  | 1  | 1  | 1  | 0  | 1  | 1  | NA | 1  | 0   | 1   | 0   | 0   | 0   | 8       | FAIR    |
| Dimopoulou et al, 2020         | 1  | 1  | 1  | 0  | 0  | 1  | 1  | NA | 1  | 0   | 1   | 0   | NA  | 0   | 7       | FAIR    |
| Hayashi et al, 2018            | 1  | 1  | 1  | 1  | 0  | 1  | 1  | NA | 1  | 0   | 1   | 0   | 0   | 1   | 9       | FAIR    |
| Iroh Tamet al, 2017            | 1  | 1  | 1  | 1  | 0  | 1  | 1  | NA | 1  | 0   | 1   | 0   | NA  | 0   | 8       | FAIR    |
| Jacob et al, 2020              | 1  | 1  | 1  | 1  | 0  | 1  | 1  | NA | 1  | 0   | 1   | 0   | 0   | 0   | 8       | FAIR    |
| Jennings et al, 2009           | 1  | 1  | 1  | NA | 0  | 1  | 1  | NA | 1  | 0   | 1   | 0   | 0   | 0   | 7       | FAIR    |
| Li-Kim-Moy et al, 2016         | 1  | 1  | 1  | 0  | 0  | 1  | 1  | NA | 1  | 0   | 1   | 0   | 0   | 1   | 8       | FAIR    |
| Małecki et al, 2017            | 1  | 1  | 1  | 1  | 0  | 1  | 1  | NA | 1  | 1   | 1   | 0   | 1   | 0   | 10      | FAIR    |
| Maltezou et al, 2008           | 1  | 1  | 1  | 0  | 0  | 1  | 1  | NA | 1  | 0   | 1   | 0   | 0   | 1   | 8       | FAIR    |
| McCulloh et al, 2013           | 1  | 1  | 0  | 1  | 0  | 1  | 1  | NA | 1  | 0   | 1   | 0   | NA  | 0   | 7       | FAIR    |
| McFall et al, 2017             | 1  | 1  | 1  | 1  | NA | 1  | 1  | 1  | 1  | 0   | 1   | 0   | NA  | 0   | 9       | FAIR    |
| Nitsch-Osuch et al, 2013       | 1  | 1  | 0  | 0  | 0  | 1  | 1  | NA | 1  | 0   | 1   | 0   | 0   | 0   | 6       | FAIR    |
| Özkaya et al, 2009             | 1  | 1  | 1  | 1  | NA | 1  | 1  | NA | 1  | 0   | 1   | 0   | 1   | 0   | 9       | FAIR    |
| Pierron et al, 2008            | 1  | 1  | 0  | 1  | 0  | 1  | 1  | NA | 1  | 0   | 1   | 0   | 0   | 0   | 7       | FAIR    |
| Rao et al, 2019                | 1  | 1  | 1  | 1  | 0  | 1  | 1  | NA | 1  | 0   | 1   | 0   | 0   | 0   | 8       | FAIR    |
| Schnell et al, 2017            | 1  | 1  | 1  | 1  | NA | 1  | 1  | NA | 1  | 0   | 1   | 0   | NA  | 0   | 8       | FAIR    |
| Schulert et al, 2013           | 1  | 1  | 0  | 0  | 0  | 1  | 1  | NA | 1  | 0   | 1   | 0   | NA  | 0   | 6       | FAIR    |
| Sharma et al , 2002            | 1  | 1  | 1  | 1  | 0  | 1  | 1  | NA | 1  | 0   | 1   | 0   | NA  | 0   | 8       | FAIR    |
| Thibeault et al, 2007          | 1  | 1  | 1  | 1  | NA | 1  | 1  | NA | 1  | 0   | 1   | 0   | NA  | 0   | 8       | FAIR    |

|                           |   |   |    |    |    |   |   |    |   |   |   |   |    |   |      |
|---------------------------|---|---|----|----|----|---|---|----|---|---|---|---|----|---|------|
| Van Esso et al, 2019      | 1 | 1 | NA | 0  | 0  | 1 | 1 | 0  | 1 | 0 | 0 | 0 | 0  | 5 | POOR |
| Vest Schneider et a, 2018 | 1 | 1 | 1  | 1  | 0  | 1 | 1 | NA | 1 | 0 | 1 | 0 | 1  | 9 | FAIR |
| Walls et al, 2016         | 1 | 1 | 1  | NA | NA | 1 | 1 | NA | 1 | 0 | 1 | 0 | NA | 7 | FAIR |

**Table S2. NIH Assessment Tools for Before and After studies.**

|                          | Q1 | Q2 | Q3 | Q4 | Q5 | Q6 | Q7 | Q8 | Q9 | Q10 | Q11 | Q12 | Overall | QUALITY |
|--------------------------|----|----|----|----|----|----|----|----|----|-----|-----|-----|---------|---------|
| Ayanruoh et al, 2009     | 1  | 1  | 1  | 1  | NA | 1  | 1  | 0  | 0  | 1   | 0   | NA  | 7       | FAIR    |
| Bird et al, 2021         | 1  | 1  | 1  | NA | NA | 1  | 1  | 0  | 0  | 1   | 0   | NA  | 6       | FAIR    |
| Crook et al, 2020        | 1  | 1  | 1  | 1  | 0  | 1  | 1  | 0  | NA | 1   | 1   | NA  | 8       | FAIR    |
| Halverson et al, 2011    | 1  | 1  | NA | NA | NA | 1  | 1  | 0  | 0  | 0   | 0   | NA  | 4       | POOR    |
| Jun et al, 2016          | 1  | 1  | 1  | 1  | NA | 1  | 1  | 0  | 0  | 1   | 0   | NA  | 7       | FAIR    |
| Keske et al, 2018        | 1  | 1  | 1  | 1  | NA | 1  | 1  | 0  | NA | 1   | 0   | NA  | 7       | FAIR    |
| Kim et al, 2021          | 1  | 1  | 1  | 1  | NA | 1  | 1  | 0  | NA | 1   | 1   | NA  | 8       | FAIR    |
| Kitano et al, 2019       | 1  | 1  | 1  | 0  | NA | 1  | 1  | 0  | 1  | 1   | 0   | NA  | 7       | FAIR    |
| Kose et al, 2016         | 1  | 1  | NA | 1  | NA | 1  | 1  | 0  | 0  | 1   | 0   | NA  | 6       | FAIR    |
| Lee et al, 2020          | 1  | 1  | 1  | 1  | NA | 1  | 1  | 0  | NA | 1   | 0   | NA  | 7       | FAIR    |
| Mitchell et al, 2018     | 1  | 1  | 1  | 1  | NA | 1  | 1  | 0  | NA | 1   | 0   | NA  | 7       | FAIR    |
| Nitsch-Osuch et al, 2017 | 1  | 1  | NA | 1  | NA | 1  | 1  | 0  | 0  | 1   | 0   | NA  | 6       | FAIR    |
| O' Callaghan et al, 2019 | 1  | 1  | NA | NA | NA | 1  | 1  | 0  | 0  | 1   | 0   | NA  | 5       | FAIR    |
| Patel et al, 2020        | 1  | 1  | 1  | NA | NA | 1  | 1  | 0  | 0  | 1   | NA  | NA  | 6       | FAIR    |
| Reischl et al, 2020      | 1  | 1  | 1  | 1  | NA | 1  | 1  | 0  | NA | 1   | 0   | NA  | 7       | FAIR    |
| Rogers et al, 2015       | 1  | 1  | 1  | 1  | NA | 1  | 1  | 0  | NA | 1   | 0   | NA  | 7       | FAIR    |
| Subramony et al, 2016    | 1  | 1  | 1  | 1  | NA | 1  | 1  | 0  | NA | NA  | 1   | NA  | 7       | FAIR    |
| Vecino-Ortiz et al, 2018 | 1  | 0  | 1  | NA | NA | 1  | 1  | 0  | 0  | 1   | NA  | NA  | 5       | FAIR    |
| Yoshida et al, 2021      | 1  | 1  | 1  | 1  | NA | 1  | 1  | 0  | NA | 1   | 0   | NA  | 7       | FAIR    |

**Table S3. NIH Assessment Tools for Randomized Controlled Trial.**

|                       | Q1 | Q2 | Q3 | Q4 | Q5 | Q6 | Q7 | Q8 | Q9 | Q10 | Q11 | Q12 | Q13 | Q14 | Overall | QUALITY |
|-----------------------|----|----|----|----|----|----|----|----|----|-----|-----|-----|-----|-----|---------|---------|
| Abanses et al, 2006   | 0  | 1  | 1  | 0  | 0  | 1  | 1  | 1  | 1  | 1   | 1   | 0   | 1   | 0   | 9       | FAIR    |
| Bonner et al, 2003    | 1  | 1  | 1  | NA | NA | 1  | 1  | 1  | 1  | 1   | 1   | NR  | 1   | 1   | 11      | GOOD    |
| Echavarríaet al, 2018 | 1  | 1  | 1  | 1  | 0  | 1  | NR | NR | 1  | 1   | 1   | 1   | 1   | 1   | 11      | GOOD    |
| Iyer et al, 2006      | 1  | 0  | 0  | 0  | 0  | 1  | 1  | 1  | 1  | 1   | 1   | 1   | 1   | 1   | 10      | FAIR    |
| May et al, 2019       | 1  | 1  | 1  | 0  | 0  | 1  | 1  | 1  | 1  | 1   | 1   | 1   | 1   | 1   | 12      | GOOD    |
| Poehling et al, 2006  | 1  | 1  | 1  | 0  | 0  | 1  | 1  | 1  | 1  | 1   | 1   | 1   | 1   | 1   | 12      | GOOD    |
| Rao et al, 2021       | 1  | 1  | 1  | 0  | 0  | 1  | 0  | 1  | 1  | 1   | 1   | 1   | 1   | 1   | 11      | GOOD    |
| Wishaupt et al, 2011  | 1  | 1  | 0  | 1  | 0  | 1  | 1  | 1  | 1  | 1   | 1   | 1   | 1   | 1   | 12      | GOOD    |

**Table S4. NIH Assessment Tools for Case-Control Trial.**

|                    | Q1 | Q2 | Q3 | Q4 | Q5 | Q6 | Q7 | Q8 | Q9 | Q10 | Q11 | Q12 | Overall | QUALITY |
|--------------------|----|----|----|----|----|----|----|----|----|-----|-----|-----|---------|---------|
| Noyola et al, 2000 | 1  | 1  | 0  | 1  | 1  | 1  | 0  | 1  | 1  | 1   | 0   | 1   | 9       | GOOD    |
